# Supplementary material for: Understanding the Molecular Conformation and Viscoelasticity of Low Sol-Gel Transition Temperature Gelatin Methacryloyl Suspensions
Source: MDPI journal article supplement (doi:10.3390/ijms24087489), 2023-04-19
Supplement: s1 [file s1]

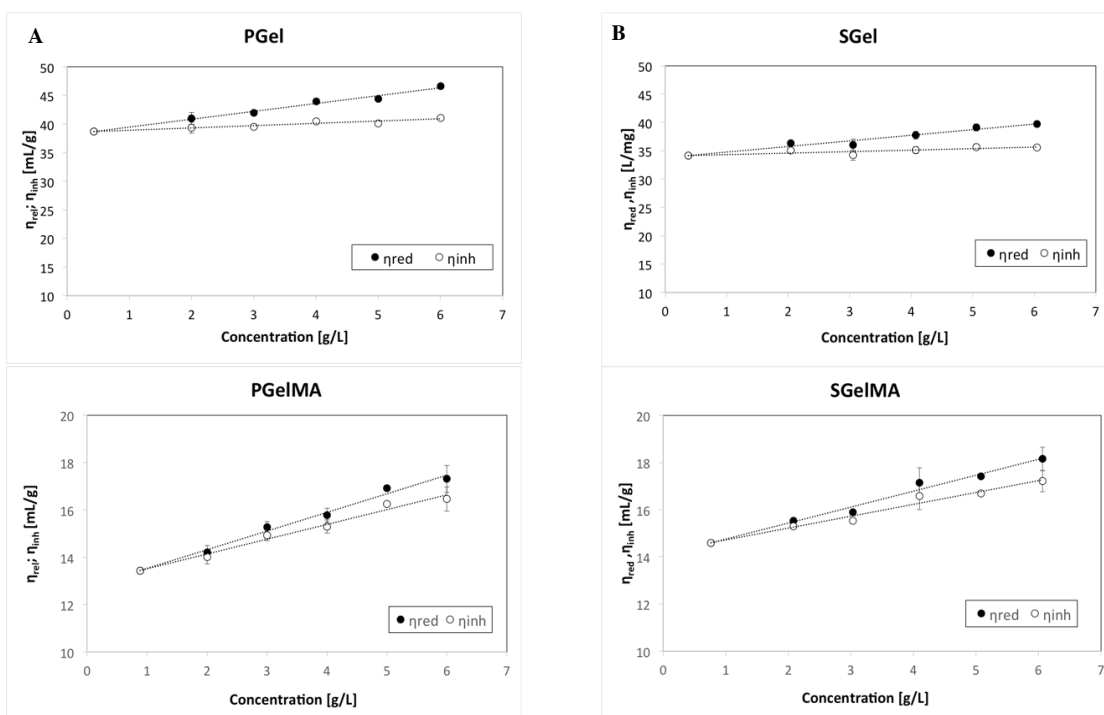

**Figure S2.** Double extrapolation of the reduced viscosity ( $\eta_{red}$ ) and inherent viscosity ( $\eta_{inh}$ ) obtained by capillary viscometry, for the determination of the intrinsic viscosity  $[\eta]$ . A) PGel (top) and PGelMA (bottom), B) SGel (top) and SGelMA (bottom).
