# Supplementary figures and images for: Understanding the Molecular Conformation and Viscoelasticity of Low Sol-Gel Transition Temperature Gelatin Methacryloyl Suspensions
Source: MDPI journal article supplement (doi:10.3390/ijms24087489), 2023-04-19

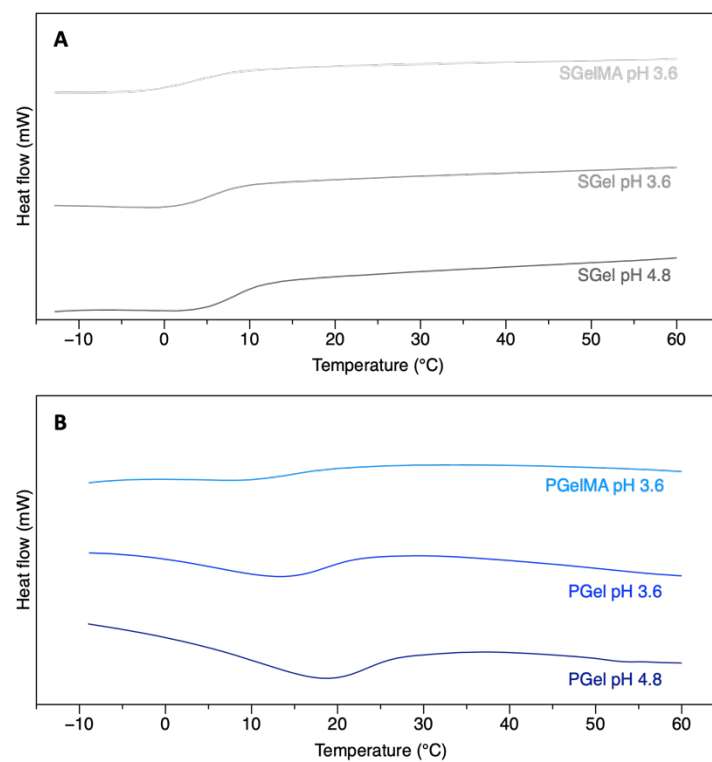

*Figure S5. DSC endotherms of gelatin and GelMA samples 20% w/v from salmon(A), and porcine (B) origin*

Supplement: s1 [file s1]

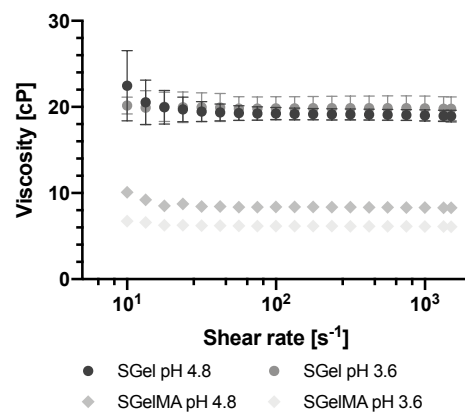

**Figure S4.** Shear rate and viscosity values of SGel and SGelMA suspensions (10% w/v) at pH ~ 3.6 and 4.8 at 20°C.

Supplement: s1 [file s1]

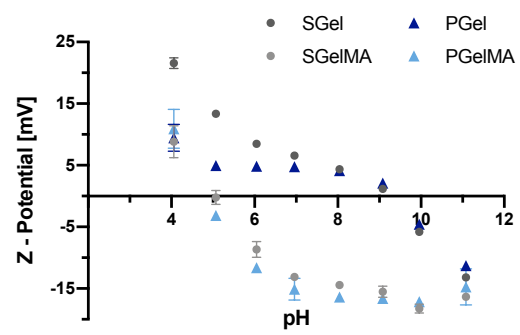

*Figure S3.  $\zeta$ -potential of different gelatin and GelMA suspensions at different pH values.*

Supplement: s1 [file s1]
